# Supplementary material
Source: PubMed Central journal article supplement (PMC3064555)
Supplement: NIHMS153793-supplement-supp1.pdf [file NIHMS153793-supplement-supp1.pdf]

"SUPPLEMENTAL MATERIAL."

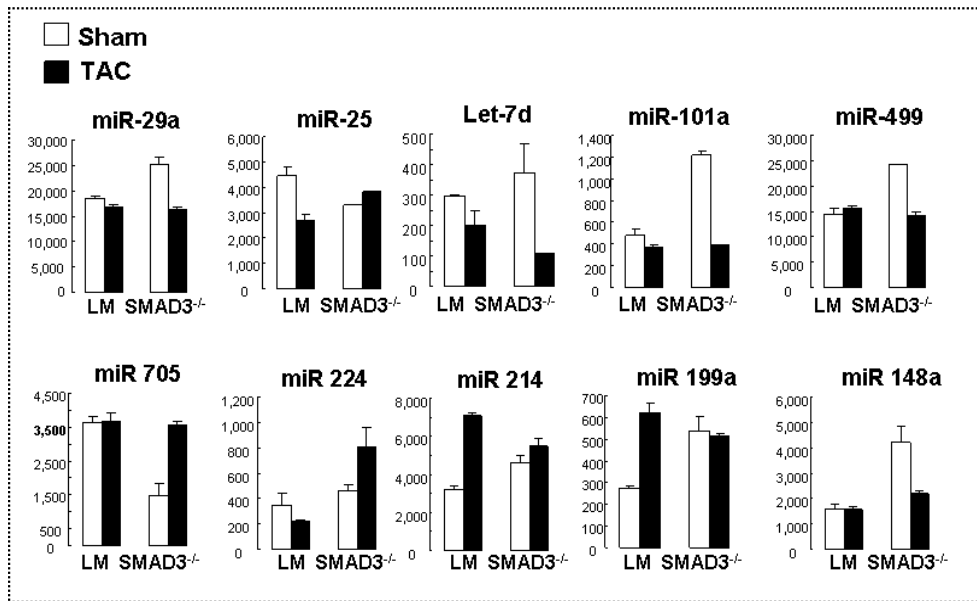

**Supplemental Figure 1:** MicroRNA microarray in sham operated and banded mice. Absolute expression levels of ten candidate microRNAs (from figure 5D in the manuscript) in SMAD3<sup>-/-</sup> and littermate control mice subjected to sham operation or (open bars) or transaortic constriction (TAC [closed bars]). (Scale : 1-65,535 representing signal intensity corresponding to microRNA expression level)
